# Supplementary material for: Satellite Detection of NO 2 Distributions and Comparison with Ground-Based Concentrations
Source: Copernicus journal article supplement (doi:10.5194/egusphere-2025-226), 2025-02-13
Supplement: Supplementary file 1 [file egusphere-2025-226-supplement.pdf]

## Supporting Information

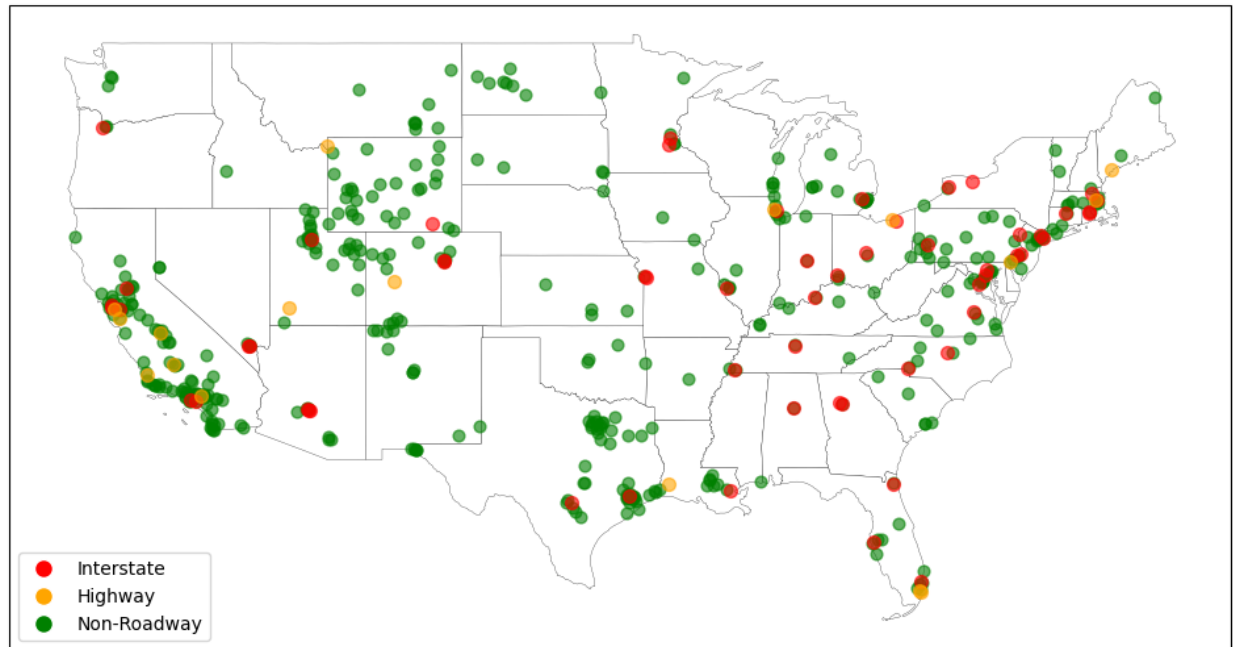

Figure S1. All U.S. EPA AQS NO<sub>2</sub> ground-based monitors classified as non-roadway (green), interstate (red), and highway (orange).

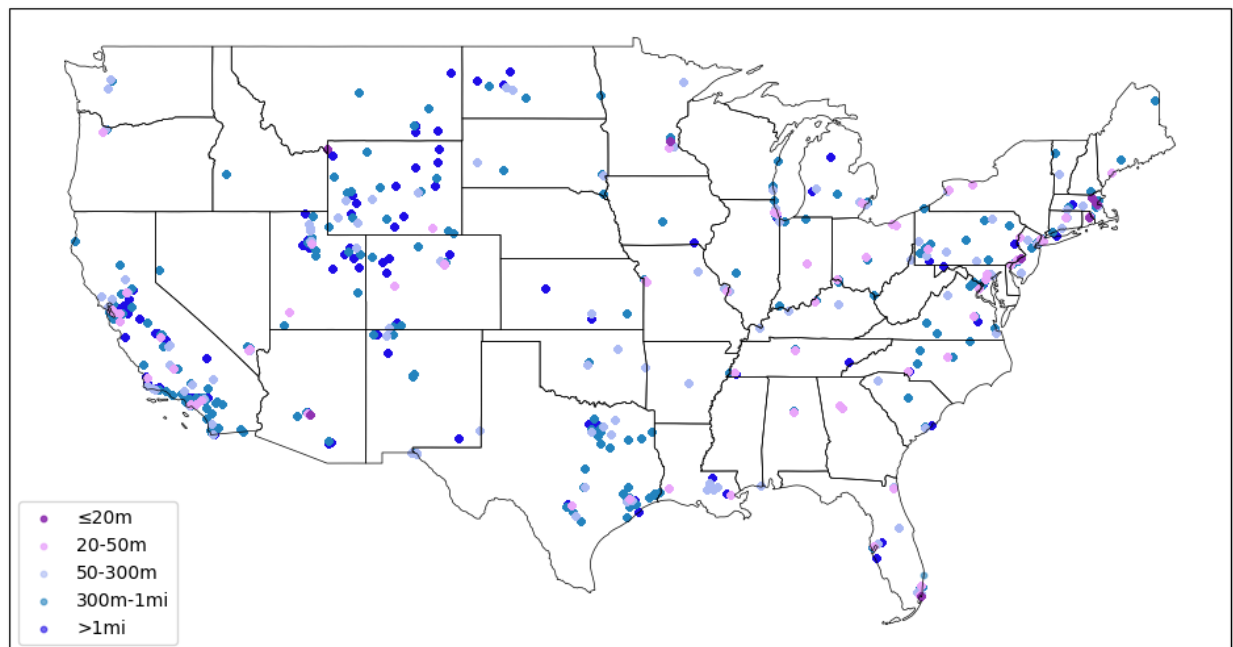

Figure S2. All U.S. EPA AQS NO<sub>2</sub> ground-based monitors classified by their distance from a major roadway: monitors less than or equal to 20m from a road (purple), between 20 and 50m

from a road (lilac), between 50 and 300m (periwinkle), between 300m and one mile (blue), and greater than one mile from a road (dark blue).

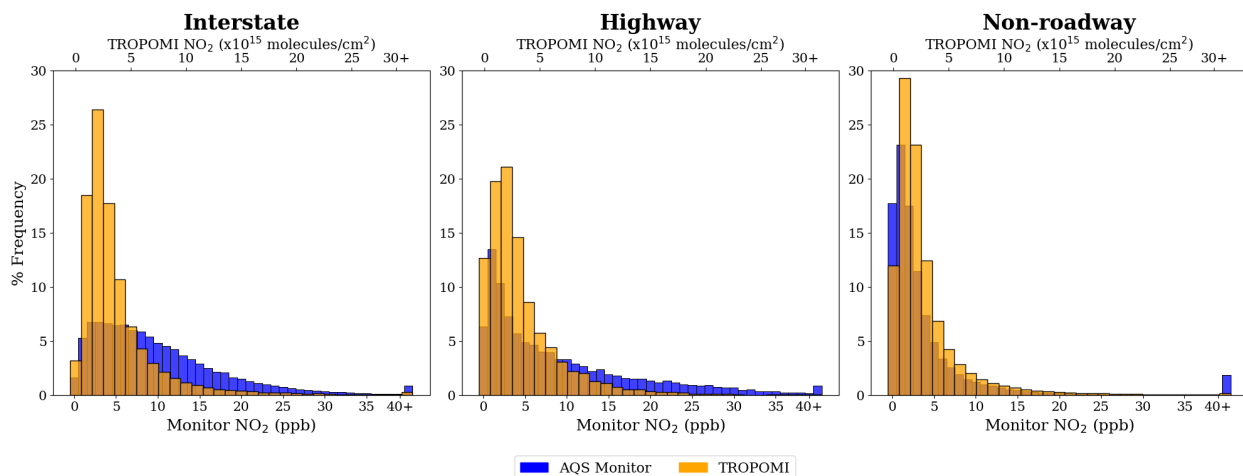

Figure S3. Distribution of 2019-2023 NO<sub>2</sub> measured by AQS ground-based monitors (blue) and TROPOMI (orange) across three monitor classifications, where roadway monitors are classified as being within 50 meters of a roadway: Interstate, Highway, and Non-roadway. The primary, lower x-axis shows the monitor NO<sub>2</sub> concentrations in parts per billion (ppb) and a secondary, upper x-axis shows satellite NO<sub>2</sub> VCD in 10<sup>15</sup> molecules per cm<sup>2</sup>. The y-axis represents the percent frequency of NO<sub>2</sub> observations within each NO<sub>2</sub> bin.

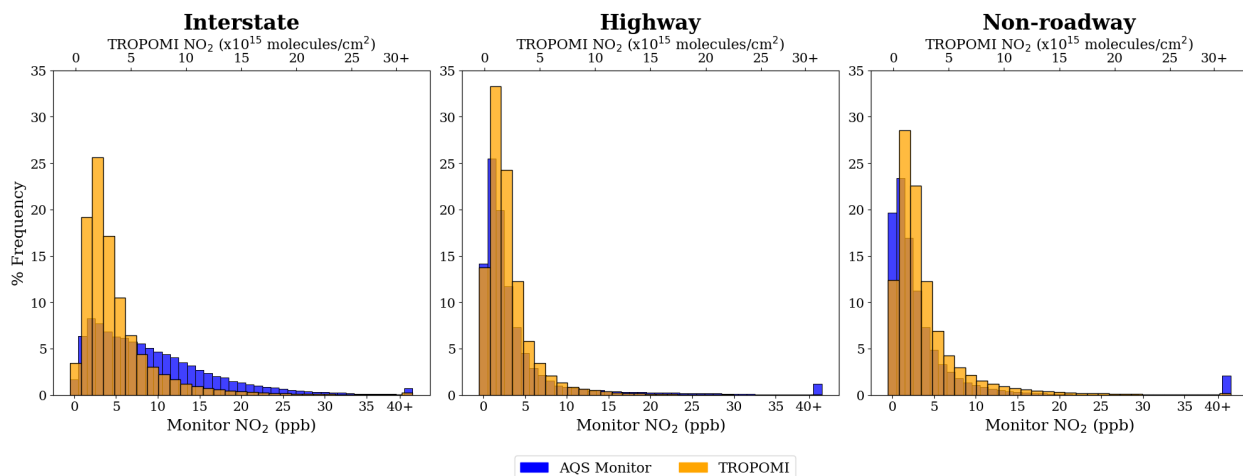

Figure S4. Distribution of 2019-2023 NO<sub>2</sub> measured by AQS ground-based monitors (blue) and TROPOMI (orange) across three monitor classifications, where roadway monitors are classified as being within 300 meters of a roadway: Interstate, Highway, and Non-roadway. The primary, lower x-axis shows the monitor NO<sub>2</sub> concentrations in parts per billion (ppb) and a secondary,

upper x-axis shows satellite NO<sub>2</sub> VCD in 10<sup>15</sup> molecules per cm<sup>2</sup>. The y-axis represents the percent frequency of NO<sub>2</sub> observations within each NO<sub>2</sub> bin.
